# Supplementary material
Source: PubMed Central journal article supplement (PMC6795287)
Supplement: jciinsight-4-129641-s115.pdf [file jciinsight-4-129641-s115.pdf]

# TUMOR INFILTRATING B-CELLS SIGNAL FUNCTIONAL HUMORAL IMMUNE RESPONSES IN BREAST CANCER

## Authors and affiliations

Soizic Garaud, Laurence Buisseret, Cinzia Solinas, Chunyan Gu-Trantien, Alexandre de Wind, Gert Van den Eynden, Celine Naveaux, Jean-Nicolas Lodewyckx, Anaïs Boisson, Hughes Duvillier, Ligia Craciun, Lieveke Ameye, Isabelle Veys, Marianne Paesmans, Denis Larsimont, Martine Piccart-Gebhart, Karen Willard-Gallo.

Supplementary information include:

Supplementary figure:

Figure S1: Gating strategies for lymphocyte subpopulations.

Figure S2: Phenotypic characterization of B-cells in blood, lymph nodes, and breast cancer tissues.

Figure S3: B-cell organization in tonsil.

Figure S4: Spatial distribution of TIL-B in human breast cancer.

Figure S5: Cytokine profile in plasma and fresh breast tissue supernatants.

Supplementary table:

Table S1: Association between clinicopathological parameters and TIL-B of patients from the BIG 02-98 clinical trial.

Table S2: Added value of infiltrating B and T cells, stromal TIL scores as continuous variables predicting DFS and OS.

Table S3A: Correlation between B cell TIL and other TIL subsets in BC.

Table S3B: TIL subset correlations between FACS and IHC in IDC.

Table S4: TIL subsets correlations by FACS.

Table S5: The antibodies used for flow cytometry.

## Supplementary figures

### Supplementary Figure S1

#### A. Gating strategies for fresh breast tissue homogenates

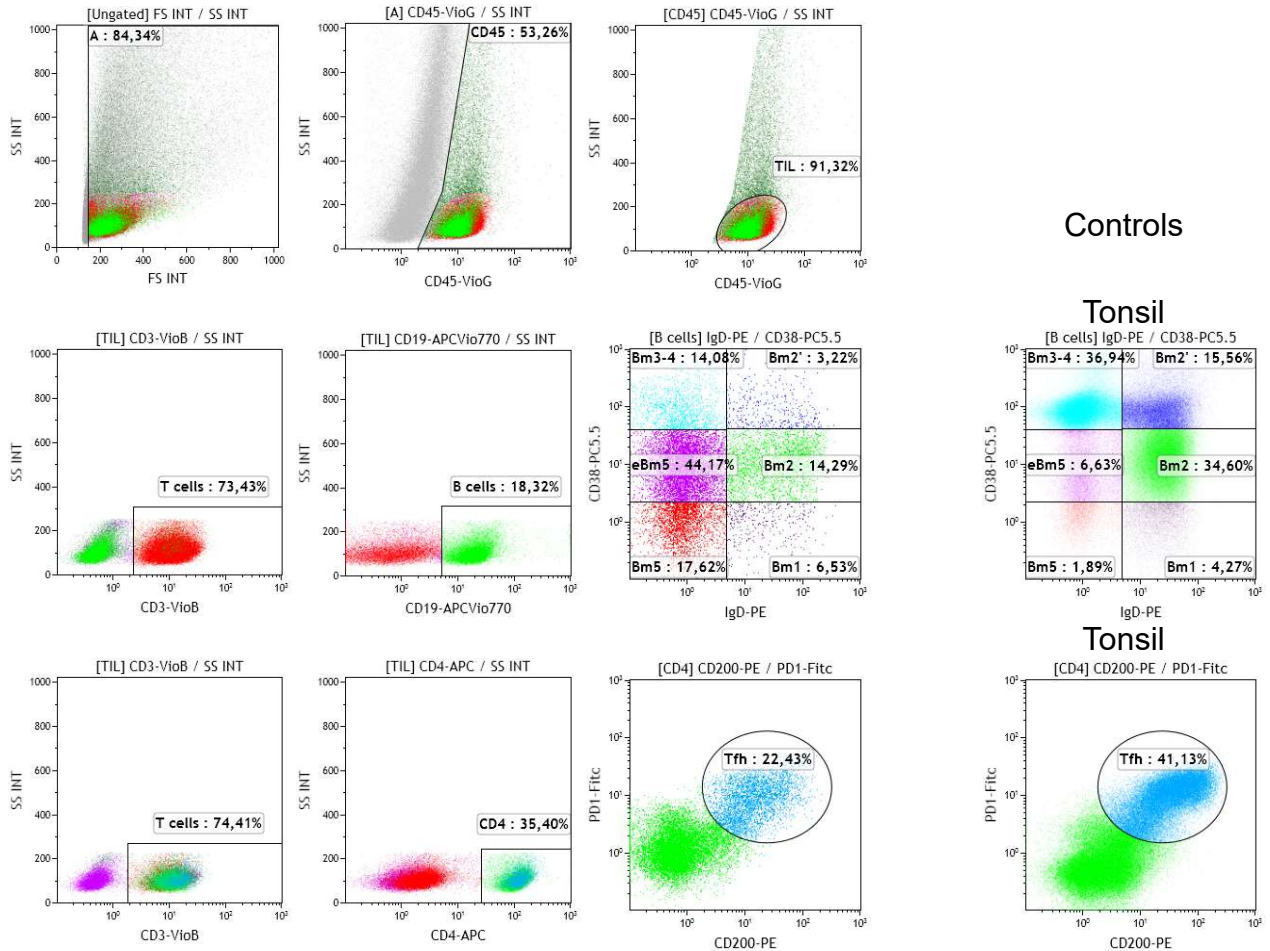

#### B. Gating strategies for blood (PBMC)

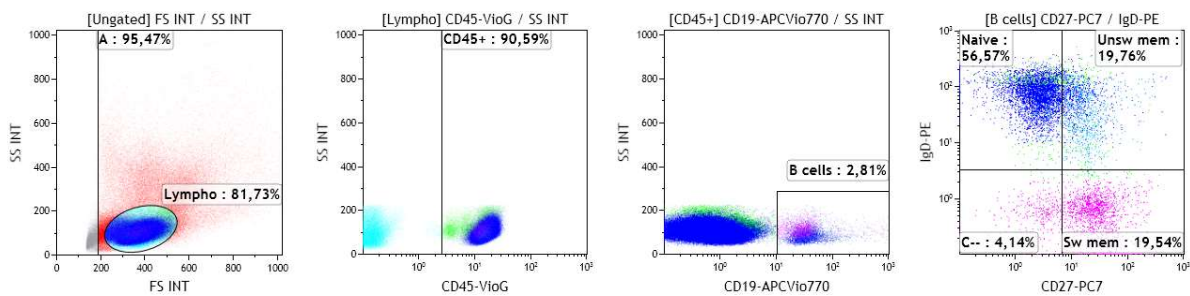

### Supplementary figure S1: Gating strategies for lymphocyte subpopulations.

(A) TIL and tonsillar mononuclear cells were labelled with antibodies specific for CD45, CD3, CD4, CD19, IgD, CD38, CD200 and PD1. (B) PBMC were labelled with antibodies specific for CD45, CD19, CD27, and IgD.

**Supplementary Figure S2**

**A. CD19<sup>+</sup> B cells in Blood (PBMC)**

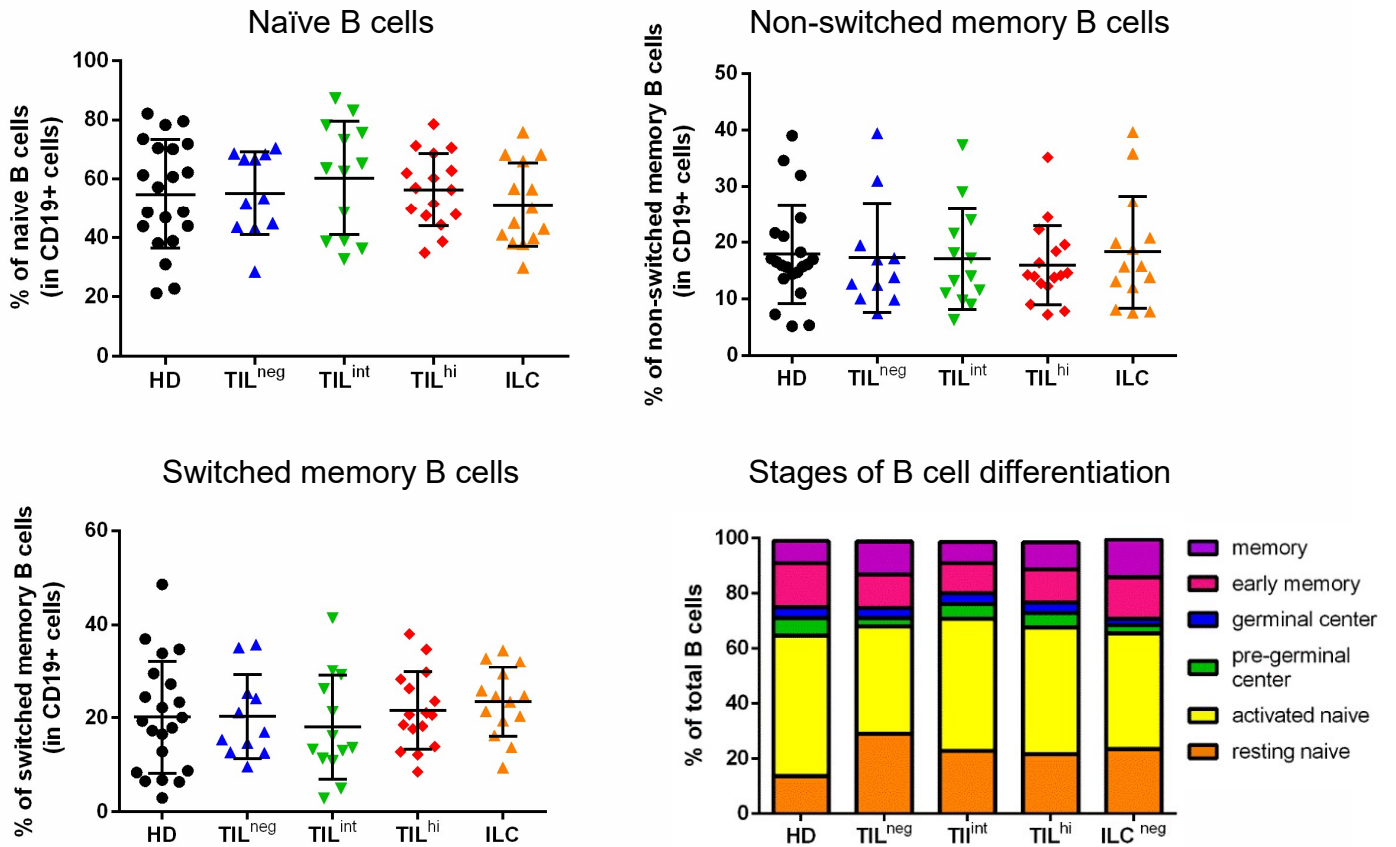

**B. CD19<sup>+</sup> B cells in Tonsil and involved Lymph Node Tissues**

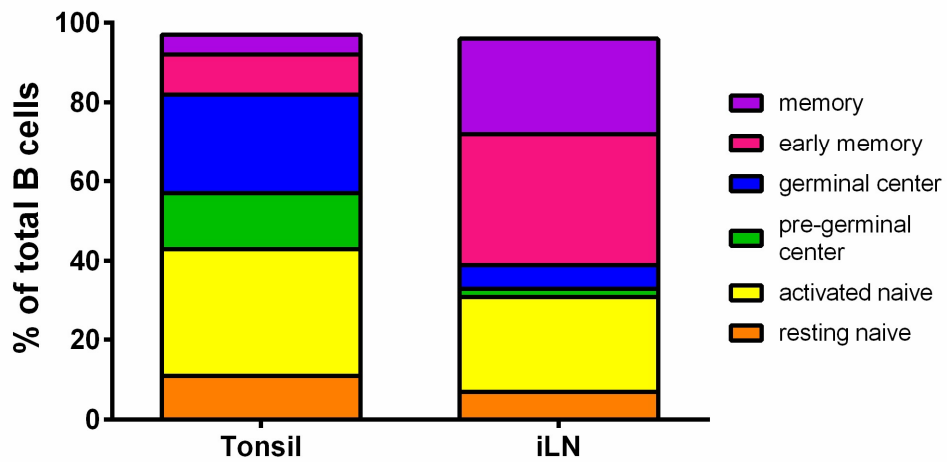

C. CD19<sup>+</sup> B cells in Breast Tissues

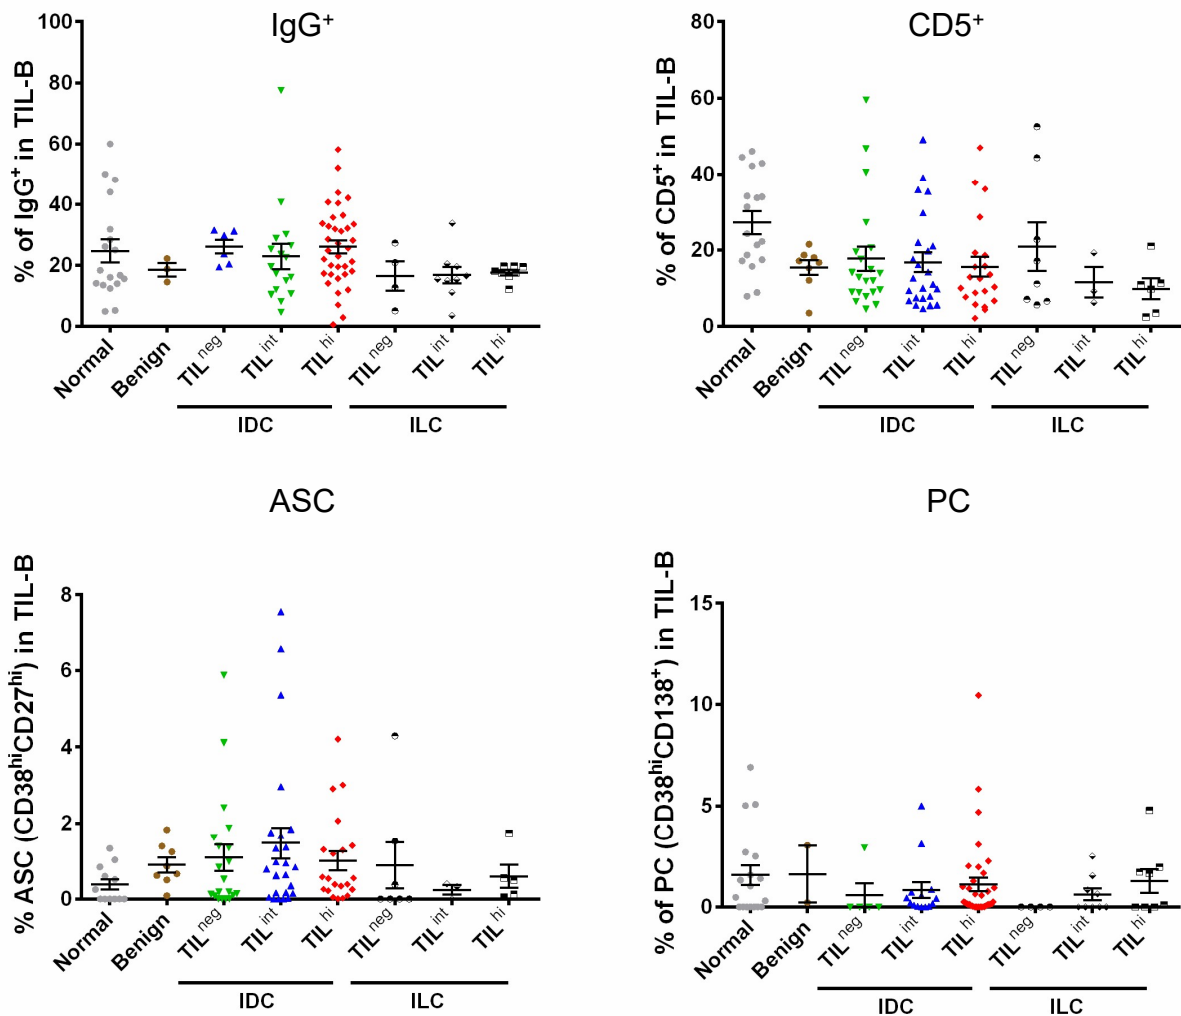

**Supplementary figure S2: Phenotypic characterization of B-cells in blood, lymph nodes, and breast cancer tissues.**

(A) B-cell subsets were determined as a percentage of CD45<sup>+</sup> leukocytes in the blood by FACS. (B) Stacked bars show the percentage of TIL-B subsets in total B-cells according to the Bm classification (CD38 and IgD) in tonsil and involved lymph node tissues. (C) B-cell subsets were determined as a percentage of CD19<sup>+</sup> TIL-B in the breast tissues by FACS. Data represent a combination of experiments involving individual patients. Abbreviations: HD, healthy donors; TIL, tumor-infiltrating lymphocytes; LN, lymph nodes; IDC, invasive ductal carcinoma; ILC, invasive lobular carcinoma; ASC, antibody-secreting B-cells; PC, plasma cells.

### Supplementary Figure S3

#### A. H&E and IF-stained human tonsil tissues

##### Hematoxylin and Eosin

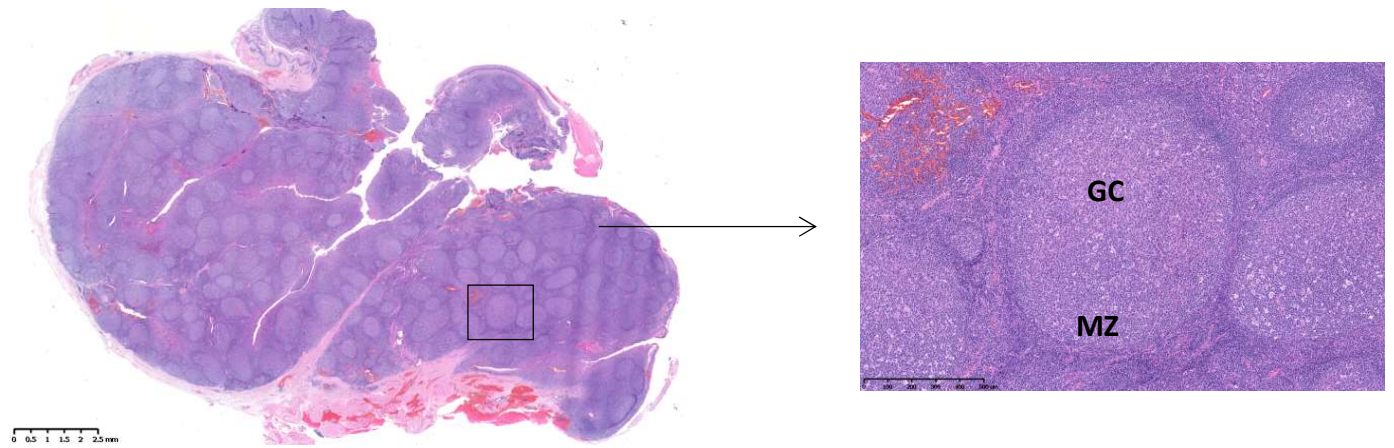

##### Immunofluorescence (confocal microscopy)

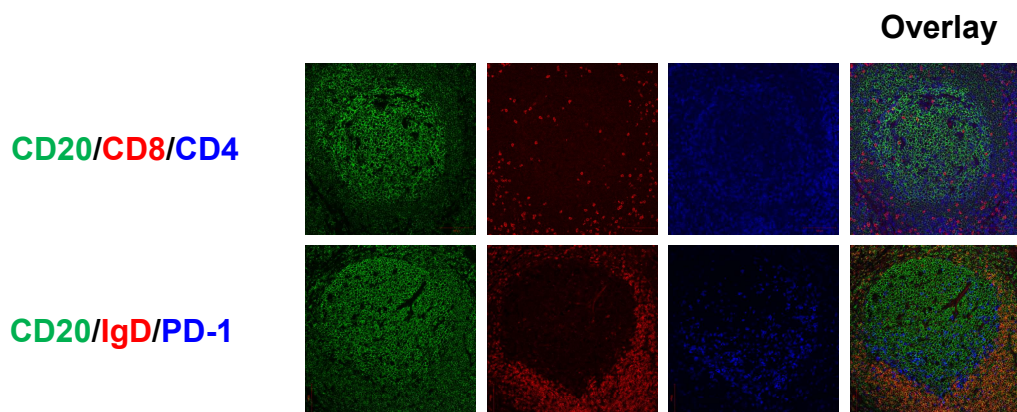



B. IF and mIHC-stained human tonsil tissues

Immunofluorescence (confocal microscopy)

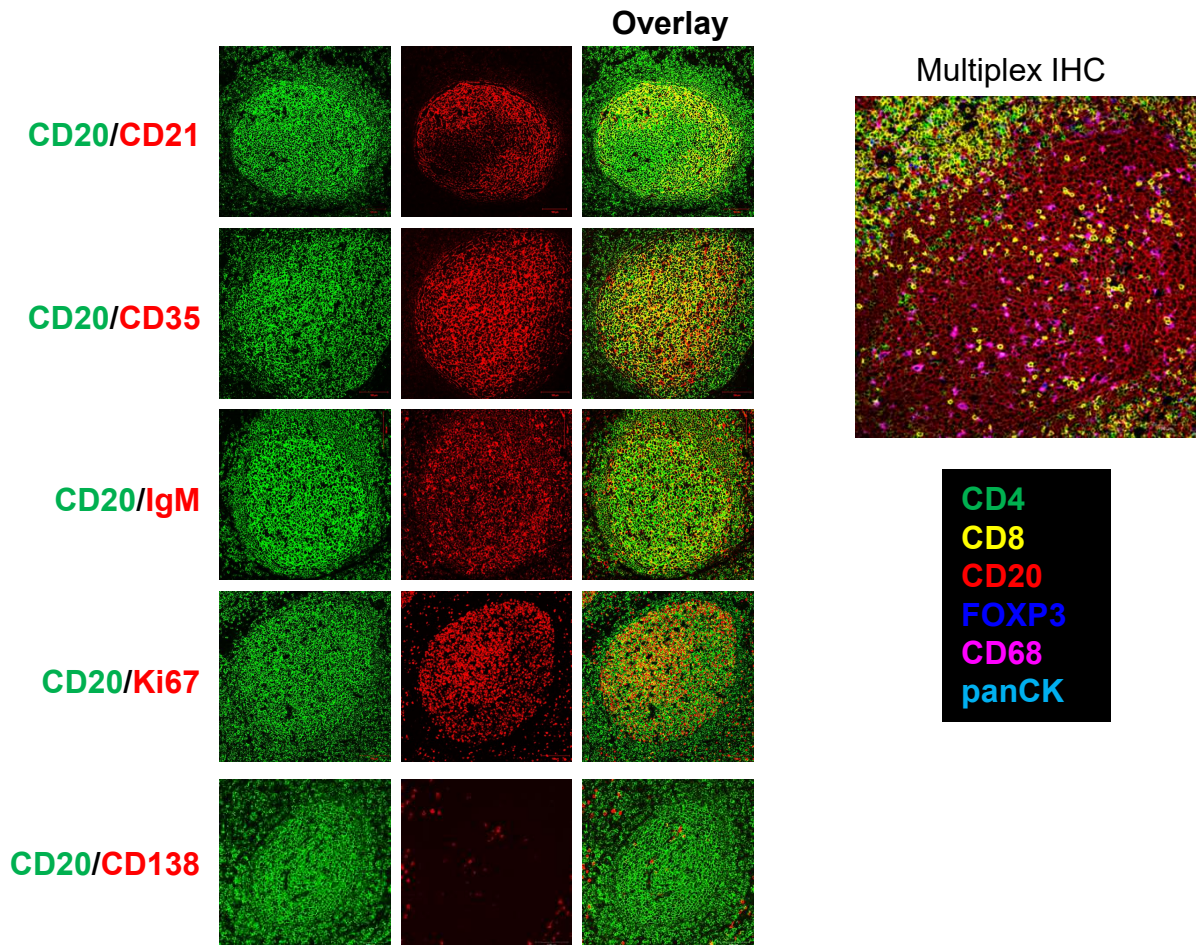

**Supplementary figure S3: B-cell organization in tonsil.**

(A) Hematoxylin and eosin and immunofluorescent staining of tonsil (20X). Lymphocytes were revealed by CD20 (green), CD8 (red) and CD4 (blue). Germinal center were identified by the absence of naïve IgD+ B-cells (red) and the presence of PD-1+ cells (blue) (B), CD21+ CD35+ (red) follicular dendritic cells, IgM+ (red) memory B-cells, Ki67+ (red) proliferating cells, and CD138+ (red) plasma cells. (B) Representative multiplexed IHC images of tonsil. Lymphocytes were revealed by CD20 (red), CD8 (yellow) and CD4 (green), FOXP3 (blue), CD68 (magenta), and tumor cells by panCK (cyan).

## Supplementary Figure S4

### A. Composite view

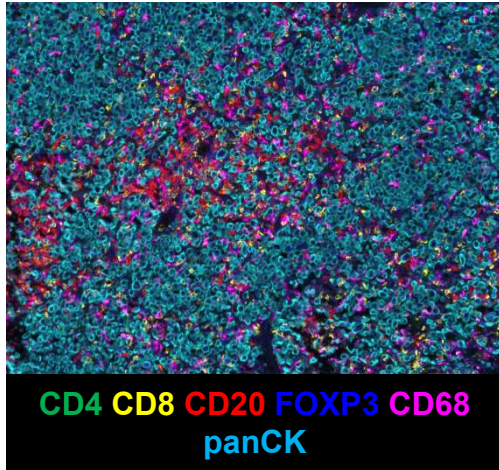

### B. View of TIL-B touching tumor cells

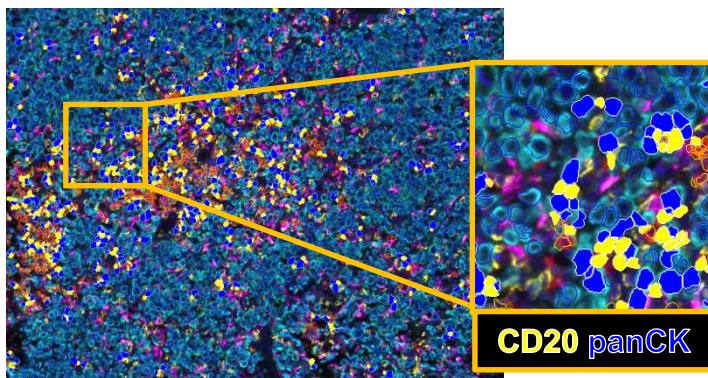

#### TIL-B/Tumor cells

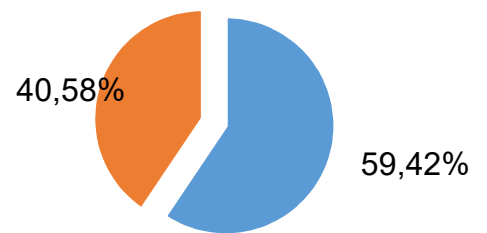

■ Non-touching ■ Touching

### C. View of TIL-B touching CD8+ TIL

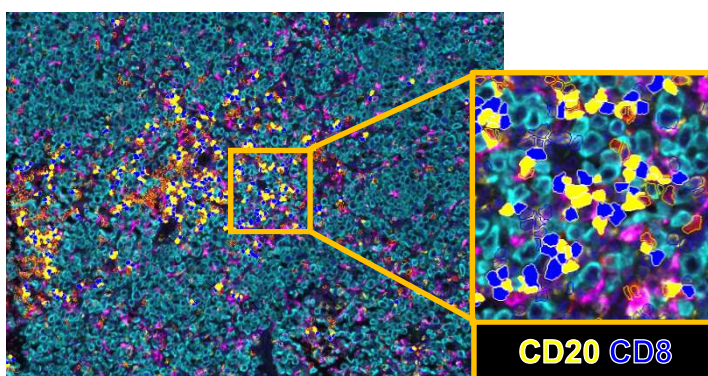

#### TIL-B/CD8-TIL

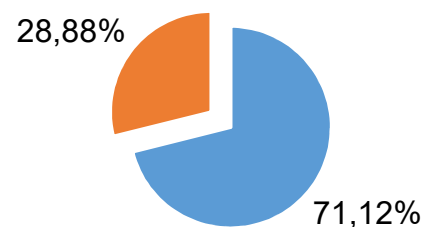

■ Non-Touching ■ Touching

### Supplementary figure S4: Spatial distribution of TIL-B in human breast cancer.

Pseudo colored composite of "unmixed" component planes (A). Cells were phenotyped in inForm<sup>®</sup>, and interactions assessed with R and phenoptr ("Find and count touching cells"). Pie graphs denote the percentage of TIL-B touching tumor cells (CK+) (B) and CD8+ TIL (C) in the tumor microenvironment. Touching TIL-B and tumor cells/CD8+ TIL were labelled in yellow and blue, respectively.

## Supplementary Figure S5

### A. Cytokine expression (protein) in plasma

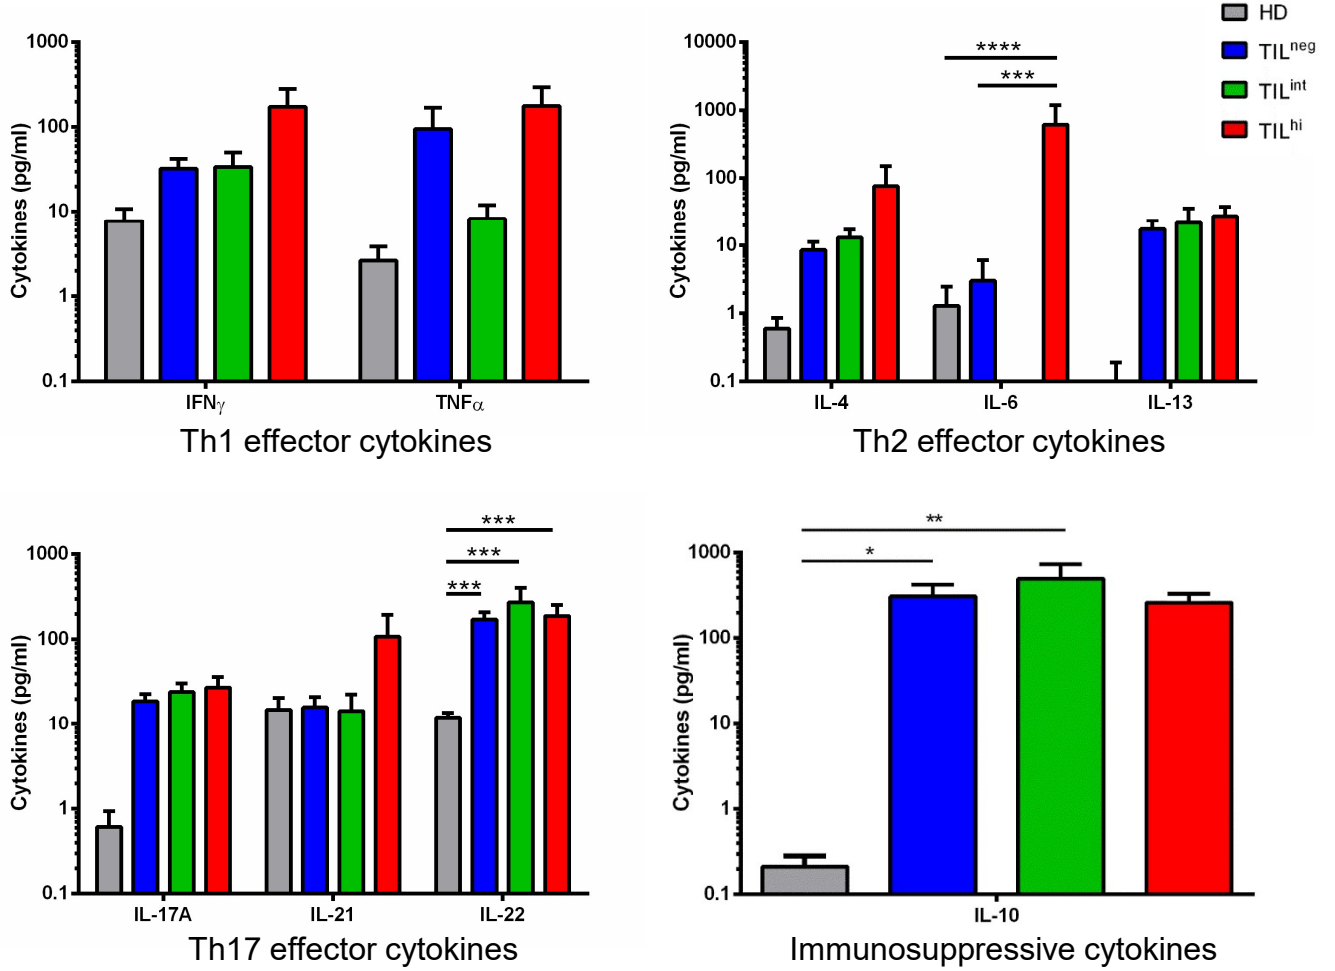



B. Cytokine expression (protein) in tissue supernatants

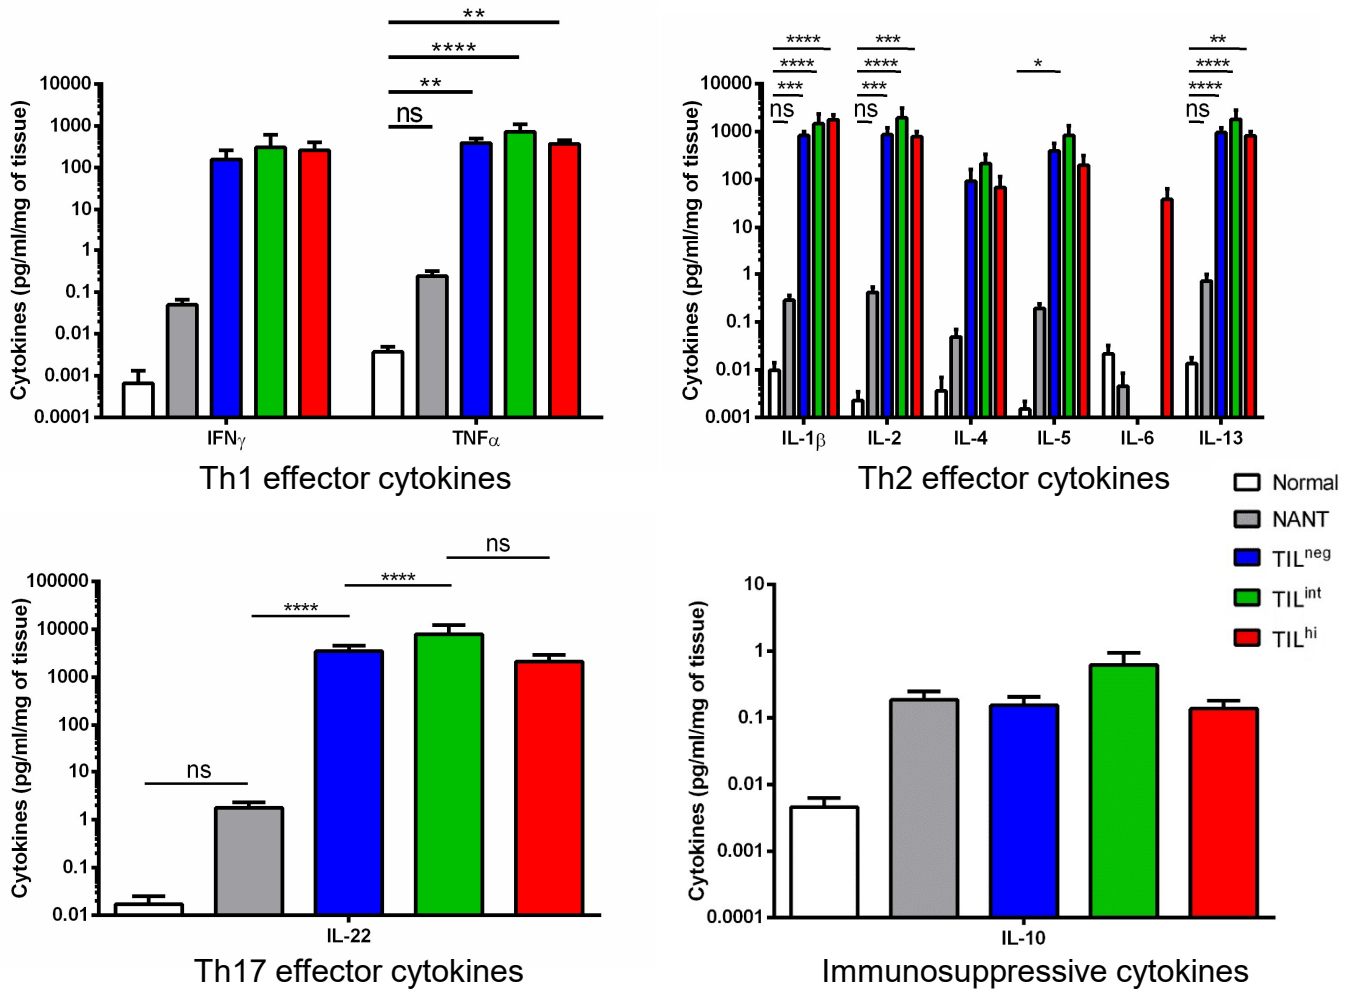

Supplementary figure S5: Cytokine profile in plasma and fresh breast tissue supernatants.

Interleaved bars show the protein levels of cytokines in plasma from healthy donors and BC patients (A) together with fresh breast tissue supernatants (mammary reductions, NANT and tumors) (B). Data represent a combination of experiments involving individual patients and are displayed as mean  $\pm$  SEM by One-Way ANOVA with Tukey multiple comparisons test. \*P < 0.05, \*\*P < 0.01, \*\*\*P < 0.001, and \*\*\*\*P < 0.0001. Abbreviations: IL, interleukin; TIL, tumor-infiltrating lymphocytes.

**Table S1: Association between clinicopathological parameters and TIL-B of patients from the BIG 02-98 clinical trial.**

|                                 |                        | Association with TIL-B (IHC) |        |              |                                   |
|---------------------------------|------------------------|------------------------------|--------|--------------|-----------------------------------|
|                                 |                        | Number                       | Median | IQR          | p Value                           |
| <b>Age (years)</b>              | <50                    | 127                          | 2.0    | 0.78 to 4.50 | 0.11                              |
|                                 | ≥50                    | 121                          | 2.5    | 1.00 to 5.50 |                                   |
| <b>Surgery</b>                  | Mastectomy             | 144                          | 2.25   | 0.89 to 4.88 | 0.56                              |
|                                 | Tumorectomy            | 104                          | 2.28   | 0.94 to 5.50 |                                   |
| <b>Histology</b>                | Ductal                 | 232                          | 2.25   | 0.89 to 5.08 | 0.68<br>(ductal vs other)         |
|                                 | Lobular                | 7                            | 2.65   | 0.75 to 3.00 |                                   |
|                                 | Mixed (ductal+lobular) | 3                            | 1.80   | 1.50 to 2.25 |                                   |
|                                 | Other                  | 6                            | 2.69   | 2.25 to 3.50 |                                   |
| <b>Node status</b>              | 1-3                    | 127                          | 2.45   | 1.00 to 5.50 | 0.40                              |
|                                 | 4-9                    | 79                           | 2.00   | 0.80 to 5.00 |                                   |
|                                 | ≥10                    | 42                           | 2.10   | 0.85 to 3.25 |                                   |
| <b>Stage (AJCC staging)</b>     | II                     | 121                          | 2,5    | 1,0 to 5,5   | 0,13                              |
|                                 | III                    | 127                          | 2      | 0,85 to 4,5  |                                   |
| <b>Histological grade</b>       | 1                      | 3                            | 0.85   | 0.25 to 1.75 | <b>0.02</b><br>(grade 3 vs other) |
|                                 | 2                      | 55                           | 1.75   | 0.75 to 4.25 |                                   |
|                                 | 3                      | 187                          | 2.50   | 1.00 to 5.50 |                                   |
| <b>Ki67-Proliferation index</b> | <20%                   | 36                           | 1.50   | 0.75 to 2.88 | <b>0.04</b>                       |
|                                 | ≥20%                   | 205                          | 2.50   | 1.00 to 5.25 |                                   |
| <b>Hormonal receptors (IHC)</b> | ER negative            | 51                           | 2.50   | 1.00 to 6.00 | <b>0.01</b>                       |
|                                 | ER positive            | 84                           | 1.90   | 0.75 to 3.25 |                                   |
|                                 | PR negative            | 70                           | 2.25   | 1.00 to 5.25 | <b>0.04</b>                       |
|                                 | PR positive            | 64                           | 1.75   | 0.75 to 3.25 |                                   |
| <b>HER-2 receptor (FISH)</b>    | HER-2 negative         | 113                          | 2,5    | 1,00 to 6,25 | 0,09                              |
|                                 | HER-2 positive         | 135                          | 2      | 0,88 to 4,50 |                                   |
| <b>Tumor size</b>               | <20                    | 58                           | 2.48   | 0.75 to 7.50 | 0.12                              |
|                                 | 20-49                  | 152                          | 2.45   | 1.00 to 5.00 |                                   |
|                                 | ≥50                    | 38                           | 1.73   | 0.78 to 2.50 |                                   |
| <b>Laterality</b>               | Left                   | 126                          | 2.25   | 1.00 to 5.00 | 0.46                              |
|                                 | Right                  | 122                          | 2.50   | 0.85 to 5.15 |                                   |
| <b>Treatment arm</b>            | A1                     | 45                           | 2.50   | 1.30 to 5.25 | 0.79<br>(A1, A2 vs B, C)          |
|                                 | A2                     | 47                           | 2.13   | 0.75 to 6.25 |                                   |
|                                 | B                      | 80                           | 2.25   | 1.00 to 5.00 |                                   |
|                                 | C                      | 76                           | 2.23   | 1.00 to 4.38 |                                   |
| <b>Radiotherapy</b>             | Node status            | 52                           | 2,83   | 1,13 to 6,75 | 0,14                              |
|                                 | Yes                    | 196                          | 2,06   | 0,88 to 5,00 |                                   |

The p value was determined using the chi-square or Fisher exact test when appropriate. The confidence limits were calculated using Fisher's z transformation. Bold type indicates significant (p<0.05).

Table S2: Added value of TIL-B, T cell TIL and stromal TIL scores as continuous variables for predicting DFS and OS.

| Analysis                                    | HER2+ BC                      |             |                               |             | TNBC                          |              |                               |              |
|---------------------------------------------|-------------------------------|-------------|-------------------------------|-------------|-------------------------------|--------------|-------------------------------|--------------|
|                                             | iDFS                          |             | OS                            |             | iDFS                          |              | OS                            |              |
|                                             | Likelihood Ratio ( $\chi^2$ ) | P-Value     | Likelihood Ratio ( $\chi^2$ ) | P-Value     | Likelihood Ratio ( $\chi^2$ ) | P-Value      | Likelihood Ratio ( $\chi^2$ ) | P-Value      |
| <b>Univariate</b>                           |                               |             |                               |             |                               |              |                               |              |
| Tumor size                                  | 2.20                          | 0.33        | 4.35                          | 0.11        | 5.13                          | 0.08         | 2.03                          | 0.36         |
| Histological grade                          | 0.03                          | 0.85        | 1.16                          | 0.28        | 1.49                          | 0.22         | 0.23                          | 0.63         |
| Lymph nodes involment                       | 21.46                         | <0.001      | 25.21                         | <0.001      | 5.54                          | 0.06         | 6.14                          | 0.046        |
| CD20                                        | <b>5.79</b>                   | <b>0.02</b> | <b>5.78</b>                   | <b>0.02</b> | <b>10.03</b>                  | <b>0.002</b> | <b>6.39</b>                   | <b>0.01</b>  |
| CD3                                         | <b>1.42</b>                   | 0.23        | <b>0.81</b>                   | 0.37        | <b>19.78</b>                  | <0.001       | <b>14.56</b>                  | <0.001       |
| Stromal TIL                                 | <b>3.08</b>                   | 0.08        | <b>2.58</b>                   | 0.11        | <b>14.96</b>                  | <0.001       | <b>12.51</b>                  | <0.001       |
| <b>Multivariate</b>                         |                               |             |                               |             |                               |              |                               |              |
| Base model = tumor size, grade, lymph nodes | <b>25.16</b>                  | <0.001      | <b>30.60</b>                  | <0.001      | <b>10.79</b>                  | 0.06         | <b>7.91</b>                   | 0.16         |
| Base + CD20 vs base                         | <b>4.18</b>                   | <b>0.04</b> | <b>2.62</b>                   | 0.11        | <b>5.89</b>                   | <b>0.02</b>  | <b>4.24</b>                   | <b>0.04</b>  |
| Base + CD3 vs base                          | <b>0.71</b>                   | 0.40        | <b>0.93</b>                   | 0.33        | <b>15.11</b>                  | <0.001       | <b>11.82</b>                  | <0.001       |
| Base + stromal TIL vs base                  | <b>1.55</b>                   | 0.21        | <b>1.18</b>                   | 0.28        | <b>9.49</b>                   | <b>0.002</b> | <b>9.37</b>                   | <b>0.002</b> |
| CD20 vs CD20 + CD3                          | <b>0.09</b>                   | 0.76        | <b>0.01</b>                   | 0.92        | <b>9.92</b>                   | <b>0.002</b> | <b>8.48</b>                   | <b>0.004</b> |
| CD3 vs CD20 + CD3                           | <b>4.46</b>                   | <b>0.03</b> | <b>4.98</b>                   | <b>0.03</b> | <b>0.17</b>                   | 0.68         | <b>0.31</b>                   | 0.58         |
| CD20 vs CD20 + stromal TIL                  | <b>0.40</b>                   | 0.53        | <b>0.3</b>                    | 0.58        | <b>5.03</b>                   | <b>0.02</b>  | <b>7.05</b>                   | <b>0.008</b> |
| Stromal TIL vs CD20 + stromal TIL           | <b>3.11</b>                   | 0.08        | <b>3.5</b>                    | 0.06        | <b>0.09</b>                   | 0.76         | <b>0.93</b>                   | 0.33         |
| CD3 vs CD3 + stromal TIL                    | <b>1.71</b>                   | 0.19        | <b>2</b>                      | 0.16        | <b>0.05</b>                   | 0.82         | <b>0.42</b>                   | 0.52         |
| Stromal TIL vs CD3 + stromal TIL            | <b>0.05</b>                   | 0.82        | <b>0.23</b>                   | 0.63        | <b>4.87</b>                   | <b>0.03</b>  | <b>2.47</b>                   | 0.12         |

**Table S3A: Correlation between B cell TIL and other TIL subsets in BC**

| IDC | Spearman's rho | TIL-B density (CD19+ cells/mg) | Correlation coefficient | TIL density (TIL subsets/mg) |         |         |         |
|-----|----------------|--------------------------------|-------------------------|------------------------------|---------|---------|---------|
|     |                |                                |                         | CD45                         | CD3     | CD4     | CD8     |
|     |                |                                |                         | 0.798**                      | 0.778** | 0.819** | 0.775** |
|     |                |                                | Sig. (2-tailed)         | 0.000                        | 0.000   | 0.000   | 0.000   |
|     |                |                                | N                       | 250                          | 157     | 121     | 117     |
| ILC | Spearman's rho | TIL-B density (CD19+ cells/mg) |                         | 0.879**                      | 0.809** | 0.865** | 0.740** |
|     |                |                                | Sig. (2-tailed)         | 0.000                        | 0.000   | 0.000   | 0.000   |
|     |                |                                | N                       | 54                           | 33      | 24      | 24      |

\*\* Correlation is significant at the 0.01 level (2-Tailed).

† Data from flow cytometric analysis.

**Table S3B: TIL subset correlations between FACS and IHC in IDC**

| Spearman's rho | FACS | TIL-B density (CD19+ cells/mg)       | Correlation coefficient | FACS                        |         |         |         |         | IHC                                      |                  |                  |         |       |        |         |              |         |                |
|----------------|------|--------------------------------------|-------------------------|-----------------------------|---------|---------|---------|---------|------------------------------------------|------------------|------------------|---------|-------|--------|---------|--------------|---------|----------------|
|                |      |                                      |                         | TIL density (TIL subset/mg) |         |         |         |         | TIL density (% of TIL subset/tumor area) |                  |                  |         |       |        |         |              |         |                |
|                |      |                                      |                         | CD45                        | CD3     | CD4     | CD8     | CD19    | Global TIL                               | Intrastromal TIL | Intratumoral TIL | CD3     | CD4   | CD8    | CD20    | Agregates nb | TLS nb  | TLS nb/surface |
|                |      |                                      |                         | 0.849**                     | 0.844** | 0.775** | 0.806** | 1.000   | 0.629**                                  | 0.625**          | 0.543**          | 0.515** | 0.433 | 0.452  | 0.736** | 0.546**      | 0.592** | 0.576**        |
|                |      |                                      | Sig. (2-tailed)         | 0.000                       | 0.000   | 0.003   | 0.005   |         | 0.001                                    | 0.001            | 0.005            | 0.008   | 0.082 | 0.079  | 0.000   | 0.005        | 0.002   | 0.003          |
|                |      |                                      | N                       | 25                          | 19      | 12      | 10      | 25      | 25                                       | 25               | 25               | 25      | 17    | 16     | 25      | 25           | 25      | 25             |
|                | IHC  | TIL-B density (% of CD20/tumor area) |                         | 0.713**                     | 0.701** | 0.710** | 0.705*  | 0.736** | 0.920**                                  | 0.923**          | 0.784**          | 0.791** | 0.452 | 0.513* | 1.000   | 0.418*       | 0.720** | 0.694**        |
|                |      |                                      | Sig. (2-tailed)         | 0.000                       | 0.001   | 0.010   | 0.023   | 0.000   | 0.000                                    | 0.000            | 0.000            | 0.000   | 0.060 | 0.035  |         | 0.034        | 0.000   | 0.000          |
|                |      |                                      | N                       | 25                          | 19      | 12      | 10      | 25      | 26                                       | 26               | 26               | 26      | 18    | 17     | 26      | 26           | 26      | 26             |

\*\* Correlation is significant at the 0.01 level (2-Tailed).

\* Correlation is significant at the 0.05 level (2-Tailed).



Supplemental Table 4. TIL subsets correlations by FACS.

|                   |                       | Correlations |        |         |        |          |          |                 |                   |                       |                   |                |          |                   |          |             |              |                   |       |             |              |            |      |  |  |
|-------------------|-----------------------|--------------|--------|---------|--------|----------|----------|-----------------|-------------------|-----------------------|-------------------|----------------|----------|-------------------|----------|-------------|--------------|-------------------|-------|-------------|--------------|------------|------|--|--|
|                   |                       | Gated on TIL |        |         |        |          |          | Gated on TIL-B  |                   |                       |                   |                |          | Gated on CD4+ TIL |          |             |              | Gated on CD8+ TIL |       |             |              |            |      |  |  |
|                   |                       | % CD19       | % CD3  | % CD4   | % CD8  | % NK     | % NKT    | % Resting Naive | % Activated Naive | % Pre-Germinal Center | % Germinal Center | % Early Memory | % Memory | % TLM             | % IgG+ B | % Naive CD4 | % Memory CD4 | % PD1+CD4+        | % TFH | % Naive CD8 | % Memory CD8 | % PD1+CD8+ |      |  |  |
| Gated on TIL      | % CD19                | 1            |        |         |        |          |          |                 |                   |                       |                   |                |          |                   |          |             |              |                   |       |             |              |            |      |  |  |
|                   |                       |              | 350    |         |        |          |          |                 |                   |                       |                   |                |          |                   |          |             |              |                   |       |             |              |            |      |  |  |
|                   | % CD3                 | -.691**      | 1      |         |        |          |          |                 |                   |                       |                   |                |          |                   |          |             |              |                   |       |             |              |            |      |  |  |
|                   |                       |              | .000   | 225     |        |          |          |                 |                   |                       |                   |                |          |                   |          |             |              |                   |       |             |              |            |      |  |  |
|                   | % CD4                 | -.049        | .156*  | 1       |        |          |          |                 |                   |                       |                   |                |          |                   |          |             |              |                   |       |             |              |            |      |  |  |
|                   |                       |              | .521   | .047    | 180    |          |          |                 |                   |                       |                   |                |          |                   |          |             |              |                   |       |             |              |            |      |  |  |
| Gated on TIL-B    | % CD8                 | -.373**      | .293** | -.257** | 1      |          |          |                 |                   |                       |                   |                |          |                   |          |             |              |                   |       |             |              |            |      |  |  |
|                   |                       |              | .000   | .001    |        |          |          |                 |                   |                       |                   |                |          |                   |          |             |              |                   |       |             |              |            |      |  |  |
|                   | % NK                  | -.386*       | -.369* | -.168   | .008   | 1        |          |                 |                   |                       |                   |                |          |                   |          |             |              |                   |       |             |              |            |      |  |  |
|                   |                       |              | .035   | .049    | .384   | .965     |          |                 |                   |                       |                   |                |          |                   |          |             |              |                   |       |             |              |            |      |  |  |
|                   | % NKT                 | -.356*       | .239   | -.441*  | -.293  | -.001    | 1        |                 |                   |                       |                   |                |          |                   |          |             |              |                   |       |             |              |            |      |  |  |
|                   |                       |              | .050   | .204    | .015   | .117     | .997     |                 |                   |                       |                   |                |          |                   |          |             |              |                   |       |             |              |            |      |  |  |
| Gated on CD4+ TIL | % Resting Naive       | -.004        | -.178  | -.266*  | -.032  | .429     | .502     | 1               |                   |                       |                   |                |          |                   |          |             |              |                   |       |             |              |            |      |  |  |
|                   |                       |              | .967   | .068    | .012   | .775     | .288     | .205            |                   |                       |                   |                |          |                   |          |             |              |                   |       |             |              |            |      |  |  |
|                   | % Activated Naive     | .362**       | -.236* | .280**  | -.178  | -.503    | -.792**  | -.188*          | 1                 |                       |                   |                |          |                   |          |             |              |                   |       |             |              |            |      |  |  |
|                   |                       |              | .000   | .015    | .008   | .106     | .204     | .019            | .026              |                       |                   |                |          |                   |          |             |              |                   |       |             |              |            |      |  |  |
|                   | % Pre-Germinal Center | .013         | .084   | .290**  | .046   | -.540    | -.801**  | -.320**         | .499**            | 1                     |                   |                |          |                   |          |             |              |                   |       |             |              |            |      |  |  |
|                   |                       |              | .877   | .392    | .006   | .677     | .167     | .017            | .000              | .000                  |                   |                |          |                   |          |             |              |                   |       |             |              |            |      |  |  |
|                   | % Germinal Center     | -.119        | .102   | .089    | .245** | -.186    | -.760**  | -.416**         | -.034             | .472**                | 1                 |                |          |                   |          |             |              |                   |       |             |              |            |      |  |  |
|                   |                       |              | .161   | .300    | .408   | .026     | .660     | .029            | .000              | .690                  | .000              |                |          |                   |          |             |              |                   |       |             |              |            |      |  |  |
|                   | % Early Memory        | -.133        | .247*  | .265*   | .172   | .313     | .849**   | -.547**         | -.314**           | -.057                 | .321**            | 1              |          |                   |          |             |              |                   |       |             |              |            |      |  |  |
|                   |                       |              | .116   | .011    | .012   | .119     | .451     | .008            | .000              | .507                  | .000              | .141           |          |                   |          |             |              |                   |       |             |              |            |      |  |  |
| Gated on CD8+ TIL | % Memory              | -.215*       | .103   | -.191   | .036   | .509     | .732**   | .174            | -.621**           | -.556**               | -.417**           | -.189*         | 1        |                   |          |             |              |                   |       |             |              |            |      |  |  |
|                   |                       |              | .011   | .292    | .073   | .748     | .198     | .039            | .040              | .000                  | .000              | .025           | .025     |                   |          |             |              |                   |       |             |              |            |      |  |  |
|                   | % TLM                 | -.328**      | .301** | -.275*  | .575** | .431     | .252     | -.050           | -.433**           | -.127                 | .450**            | .216*          | .139     | 1                 |          |             |              |                   |       |             |              |            |      |  |  |
|                   |                       |              | .001   | .023    | .044   | .000     | .393     | .630            | .643              | .000                  | .235              | .042           | .193     | .193              |          |             |              |                   |       |             |              |            |      |  |  |
|                   | % IgG+ B              | -.204*       | .143   | -.071   | .156   | -.181    | -.013    | -.182           | -.176             | .021                  | .235*             | .177           | .051     | .018              | 1        |             |              |                   |       |             |              |            |      |  |  |
|                   |                       |              | .049   | .288    | .607   | .275     | .732     | .981            | .092              | .103                  | .845              | .028           | .100     | .637              | .865     |             |              |                   |       |             |              |            |      |  |  |
|                   | % Naive CD4           | .231         | -.193  | .170    | -.298  | -.430    | -.531    | -.037           | .376              | -.158                 | .062              | .086           | -.341    | -.586             | -.645    | 1           |              |                   |       |             |              |            |      |  |  |
|                   |                       |              | .246   | .344    | .396   | .132     | .570     | .469            | .889              | .137                  | .545              | .812           | .744     | .181              | .299     | .240        |              |                   |       |             |              |            |      |  |  |
|                   | % Memory CD4          | -.301        | .142   | -.430** | .445*  | .707     | .334     | .155            | -.380             | .034                  | .102              | -.127          | .248     | .906*             | .312     | -.526**     | 1            |                   |       |             |              |            |      |  |  |
|                   |                       |              | .127   | .489    | .025   | .020     | .293     | .666            | .553              | .132                  | .896              | .698           | .627     | .338              | .034     | .610        | .005         |                   |       |             |              |            |      |  |  |
| Gated on CD4+ TIL | % PD1+CD4+            | -.021        | .002   | -.073   | .000   | -.188    | -.351    | -.167           | -.076             | .416**                | .511**            | .289           | -.330**  | .481**            | .149     | -.533       | .599         | 1                 |       |             |              |            |      |  |  |
|                   |                       |              | .827   | .980    | .452   | .998     | .604     | .320            | .161              | .524                  | .000              | .000           | .014     | .005              | .000     | .303        | .174         | .116              |       |             |              |            |      |  |  |
|                   | % TFH                 | .023         | -.001  | -.033   | .245*  | -.359    | -.320    | -.230*          | -.088             | .248                  | .629**            | .295*          | -.336**  | .288*             | .173     | -.261       | .216         | .340**            | 1     |             |              |            |      |  |  |
|                   |                       |              | .807   | .991    | .728   | .011     | .278     | .337            | .048              | .562                  | .032              | .000           | .010     | .003              | .038     | .216        | .497         | .577              | .000  |             |              |            |      |  |  |
| Gated on CD8+ TIL | % Naive CD8           | -.156        | .238   | .093    | .085   | -1.000** | 1.000**  | .369            | -.182             | -.450                 | -.255             | -.155          | .067     | -.079             | -.076    | .525**      | -.525**      | .342              | -.451 | 1           |              |            |      |  |  |
|                   |                       |              | .455   | .252    | .659   | .687     |          |                 | .176              | .517                  | .092              | .360           | .582     | .812              | .950     | .951        | .008         | .008              | .407  | .262        |              |            |      |  |  |
|                   | % Memory CD8          | -.156        | -.238  | -.093   | -.085  | 1.000**  | -1.000** | -.369           | -.182             | .450                  | .255              | .155           | -.067    | .079              | .078     | -.525**     | .525**       | -.342             | .451  | -1.000**    | 1            |            |      |  |  |
|                   |                       | .455         | .252   | .659    | .687   |          |          | -.176           | .517              | .092                  | .360              | .582           | .812     | .950              | .951     | .008        | .008         | .407              | .262  | .000        |              |            |      |  |  |
| % PD1+CD8+        | -.121                 | .104         | -.006  | .292**  | -.072  | -.411    | -.264*   | -.049           | .311*             | .548**                | .322**            | -.321**        | .632**   | -.031             | -.590    | .656        | .144         | .481**            | -.503 | .503        | 1            |            |      |  |  |
|                   |                       | .229         | .298   | .954    | .003   | .866     | .312     | .031            | .694              | .010                  | .000              | .008           | .008     | .000              | .837     | .218        | .157         | .149              | .000  | .309        | .309         |            |      |  |  |
|                   |                       | .101         | .102   | .102    | .102   |          |          | .67             | .67               | .67                   | .67               | .67            | .67      | .67               | .46      | .47         | .6           | .6                | .102  | .101        | .6           | .6         | .102 |  |  |

\*\* . Correlation is significant at the 0.01 level (2-Tailed).

\* . Correlation is significant at the 0.5 level (2-Tailed).

**Supplemental Table 5. The antibodies used for flow cytometry.**

| Name   |       | Clone        | Conjugation       | Firme           | Reference   | Applications                |
|--------|-------|--------------|-------------------|-----------------|-------------|-----------------------------|
| CD197  | CCR7  |              | PE                | BD              | 552176      | Flow cytometry              |
| CD10   |       | ALB1         | APC-AlexaFluor700 | Beckman Coulter | A86353      | Flow cytometry              |
| CD138  |       | B-B4         | APC               | Miltenyi        | 130-091-250 | Flow cytometry              |
| CD14   |       | TUK4         | APC-Vio770        | Miltenyi        | 130-096-622 | Flow cytometry              |
| CD19   |       | 4G7          | PE                | BD              | 345777      | Cell sorting                |
| CD19   |       | LT19         | APC-Vio770        | Miltenyi        | 130-096-643 | Flow cytometry              |
| CD1d   |       | 51.1         | PerCP-eFluor710   | eBioscience     | 46-0016     | Flow cytometry              |
| CD20   |       | 2H7          | AlexaFluor700     | eBioscience     | 56-0209     | Flow cytometry              |
| CD200  |       | OX104        | PC7               | eBioscience     | 25-9200-42  | Cell sorting/Flow cytometry |
| CD21   |       | BL13         | FITC              | Beckman Coulter | IM0473U     | Flow cytometry              |
| CD24   |       | ML5          | FITC              | BD              | 555427      | Flow cytometry              |
| CD25   |       | B1.49.9      | APC-AlexaFluor700 | Beckman Coulter | A86356      | Flow cytometry              |
| CD27   |       | 1A4CD27      | PC7               | Beckman Coulter | A54823      | Flow cytometry              |
| CD278  | ICOS  | ISA-3        | PC7               | eBioscience     | 25-9948-42  | Flow cytometry              |
| CD279  | PD1   | MIH4         | FITC              | eBioscience     | nov-69      | Cell sorting/Flow cytometry |
| CD3    |       | UCHT1        | ECD               | Beckman Coulter | A07748      | Cell sorting                |
| CD3    |       | BW264/56     | VioBlue           | Miltenyi        | 130-094-363 | Flow cytometry              |
| CD38   |       | LS198.4.3    | PC5.5             | Beckman Coulter | A70205      | Flow cytometry              |
| CD4    |       | M-T466       | APC               | Miltenyi        | 130-091-232 | Cell sorting/Flow cytometry |
| CD40   |       | HB14         | APC               | Miltenyi        | 130-094-137 | Flow cytometry              |
| CD45   |       | 5B1          | VioGreen          | Miltenyi        | 130-096-906 | Flow cytometry              |
| CD45RA |       | T6D11        | PE-Vio770         | Miltenyi        | 130-097-577 | Flow cytometry              |
| CD45RO |       | UCHL1        | FITC              | Miltenyi        | 130-095-462 | Flow cytometry              |
| CD5    |       | UCHT2        | PE                | Miltenyi        | 130-096-575 | Flow cytometry              |
| CD56   |       | N901 (HLDA6) | PE                | Beckman Coulter | A07788      | Flow cytometry              |
| CD8    |       | SFC121Thy2D3 | ECD               | Beckman Coulter | 737659      | Flow cytometry              |
| CD8    |       | BW135/80     | PerCP             | Miltenyi        | 130-094-972 | Flow cytometry              |
| CD80   |       | 2D10         | PE                | Miltenyi        | 130-097-202 | Flow cytometry              |
| CD86   |       | FM95         | FITC              | Miltenyi        | 130-094-878 | Flow cytometry              |
| CD185  | CXCR5 | TG2/CXCR5    | PC5.5             | Biologend       | 335001      | Flow cytometry              |
| HLA-DR |       |              | ECD               | Beckman Coulter |             | Flow cytometry              |
| IgD    |       | IgD26        | PE                | Miltenyi        | 130-094-539 | Flow cytometry              |
| IgG    |       | IS11-3B2.2.3 | VioBlue           | Miltenyi        | 130-099-483 | Flow cytometry              |
| IgM    |       | PJ2-22H3     | APC               | Miltenyi        | 130-093-076 | Flow cytometry              |
